# Supplementary material for: Integrated models approach for multi-environmental trial: uncovering Genotype-by-environment interaction and stability investigation of durum wheat (Triticum durum Desf.) varieties
Source: Research Square preprint supplement (doi:10.21203/rs.3.rs-7252285/v1), 2025-08-26
Supplement: Supplementary file 1 [file 8912d9578e113fb652d15153.docx]

**Table S1.** Meteorological data for experimental environments

| Climatic  variables | | November | December | January | February | March | April | May | June | Annual  Precip | Annual  RH |
| --- | --- | --- | --- | --- | --- | --- | --- | --- | --- | --- | --- |
| E1 | Tmax | 24.69 | 17.96 | 15.38 | 24.42 | 24.23 | 29.8 | 35.46 | 40.78 |  |  |
| Tmin | 3.75 | 1.62 | -3.01 | 0.47 | 1.7 | 2.66 | 7.22 | 12.07 |
| Tavg | 12.54 | 9.19 | 5 | 9.25 | 11.66 | 13.97 | 19.98 | 24.87 |
| RH | 71.4 | 84.15 | 80.33 | 71.21 | 66.55 | 62.7 | 53.01 | 47.47 | 67.10 |
| Precip | 43 | 51 | 32 | 24 | 2 | 40 | 2 | 37 | 231 |  |
| E2 | Tmax | 27.56 | 19.12 | 20.71 | 21.72 | 27.35 | 30.85 | 34.58 | 41.76 |  |  |
| Tmin | 2.16 | -1.57 | 0.59 | -2.71 | 0.74 | 2.74 | 6.5 | 11.51 |
| Tavg | 10.74 | 6.54 | 8.32 | 6.68 | 11.16 | 15.4 | 17.94 | 22.43 |
| RH | 73.28 | 80.18 | 73.28 | 77.37 | 67.08 | 61.46 | 63.12 | 53.87 | 68.70 |
| Precip | 96 | 23 | 33 | 29 | 41 | 35 | 29 | 4 | 290 |  |
| E3 | Tmax | 22.3 | 20.16 | 17.34 | 20.67 | 24.59 | 29.77 | 30.16 | 40.25 |  |  |
| Tmin | 5.05 | 0.27 | -1.1 | -2.08 | 0.62 | 2.72 | 4.48 | 9.34 |
| Tavg | 11.92 | 8.66 | 5.87 | 6.81 | 10.02 | 13.21 | 15.61 | 25.25 |
| RH | 74.04 | 80.63 | 83.15 | 76.3 | 72.89 | 69.18 | 68.05 | 47.99 | 71.53 |
| Precip | 46 | 66 | 116.4 | 74 | 83 | 43.6 | 100.2 | 3.2 | 532.4 |  |
| E4 | Tmax | 26.19 | 19 | 23.45 | 23.87 | 24.2 | 32.21 | 35.65 | 42.31 |  |  |
| Tmin | 5.06 | -0.77 | -3.12 | -3.4 | 0.95 | 1.88 | 8.88 | 12.6 |
| Tavg | 13.72 | 8.39 | 7.83 | 10.3 | 9.96 | 14.12 | 19.8 | 25.84 |
| RH | 72.67 | 79.36 | 74.97 | 64.45 | 71.56 | 66.57 | 59.26 | 46.44 | 66.91 |
| Precip | 36.2 | 55.2 | 28.4 | 6.4 | 38.2 | 35.4 | 32.8 | 20.6 | 253.2 |  |
| E5 | Tmax | 27.25 | 19.68 | 21.85 | 22.82 | 24.45 | 28.89 | 36.29 | 41.36 |  |  |
| Tmin | 1 | 0.5 | -1.31 | -0.6 | -0.12 | 1.99 | 6.8 | 12.87 |
| Tavg | 11.83 | 8.33 | 6.35 | 8.56 | 10.17 | 13.78 | 19.77 | 27.63 |
| RH | 70.1 | 74.5 | 76.81 | 73.45 | 74.14 | 63.02 | 55.85 | 37.72 | 65.70 |
| Precip | 11 | 36.4 | 51.4 | 26.2 | 32.6 | 30.2 | 8.6 | 2 | 198.4 |  |
| E6 | Tmax | 28.75 | 26.57 | 23.42 | 23.52 | 29.27 | 32.63 | 35.98 | 44.27 |  |  |
| Tmin | 3.68 | 3.65 | -0.12 | 2.59 | 2.36 | 1.69 | 7.38 | 13.71 |
| Tavg | 14.7 | 10.25 | 9.26 | 9.96 | 13.61 | 14.95 | 20.76 | 26.78 |
| RH | 67.69 | 76.07 | 71.44 | 71.7 | 59.67 | 60.19 | 53.19 | 42.53 | 62.81 |
| Precip | 42.2 | 82 | 12.6 | 40.8 | 20.4 | 19 | 31 | 2.6 | 250.6 |  |
| E7 | Tmax | 27.55 | 19.58 | 16.96 | 24.31 | 24.76 | 30.73 | 35.98 | 41.71 |  |  |
| Tmin | 5.3 | 2.72 | -0.28 | 2.49 | 2.96 | 4.06 | 8.21 | 13.41 |
| Tavg | 14.17 | 10.8 | 6.84 | 10.37 | 12.53 | 14.56 | 20.31 | 25.69 |
| RH | 74.22 | 83.77 | 79.56 | 75.01 | 71.3 | 67.92 | 57.97 | 50.81 | 70.07 |
| Precip | 57 | 38.4 | 120 | 95 | 25 | 41 | 0 | 20 | 396.4 |  |
| E8 | Tmax | 29.26 | 20.09 | 21.01 | 23.01 | 26.39 | 31.16 | 33.4 | 42.27 |  |  |
| Tmin | 4.36 | 0.84 | 2.2 | 0.48 | 2.65 | 4.98 | 8.8 | 14.49 |
| Tavg | 12.63 | 8.46 | 9.8 | 8.24 | 12.15 | 15.86 | 18.26 | 23.1 |
| RH | 73.5 | 78.24 | 77.03 | 79.96 | 72.1 | 68.01 | 67.85 | 59.47 | 72.02 |
| Precip | 67 | 85 | 38 | 89 | 65 | 28 | 50 | 3 | 425 |  |
| E9 | Tmax | 22.8 | 20.24 | 17.88 | 21.15 | 24.77 | 28.55 | 30.61 | 40.76 |  |  |
| Tmin | 5.54 | 1.13 | 0.15 | -0.23 | 2.15 | 3.31 | 5.03 | 9.93 |
| Tavg | 13.31 | 10.41 | 7.97 | 8.44 | 11.3 | 13.66 | 16.36 | 24.88 |
| RH | 76.16 | 82.5 | 80.84 | 77.42 | 75.63 | 74.71 | 70.93 | 56.06 | 74.28 |
| Precip | 58 | 60.4 | 82 | 37.8 | 109.2 | 31.6 | 107 | 0 | 486 |  |
| E10 | Tmax | 25.67 | 21.77 | 20.1 | 25.43 | 26.42 | 30.18 | 34.61 | 39.97 |  |  |
| Tmin | 4.15 | 1.68 | 0.62 | 2.1 | 2.97 | 4.58 | 9.99 | 12.25 |
| Tavg | 12.41 | 11.39 | 8.87 | 11 | 11.53 | 15.22 | 20.34 | 23.54 |
| RH | 74.86 | 77.76 | 82.15 | 72.69 | 77.83 | 73.94 | 61.14 | 58.39 | 72.34 |
| Precip | 66.6 | 74.2 | 20.6 | 2.2 | 102.2 | 105.6 | 1.6 | 4.8 | 377.8 |  |
| E11 | Tmax | 28.28 | 20.33 | 21.4 | 21.37 | 25.39 | 30.42 | 37.89 | 44.77 |  |  |
| Tmin | 4.38 | 0.64 | -0.38 | 0.68 | 0.39 | 2.28 | 6.67 | 15.24 |
| Tavg | 13.29 | 9.85 | 7.91 | 9.97 | 11.16 | 14.29 | 20.61 | 28.5 |
| RH | 72.98 | 78.86 | 79.32 | 75.4 | 78.01 | 67.92 | 59.45 | 40.76 | 69.08 |
| Precip | 45.2 | 122.2 | 110.8 | 14.8 | 70.8 | 21.6 | 25 | 0 | 410.4 |  |
| E12 | Tmax | 29.72 | 26.45 | 21.8 | 25.41 | 29.61 | 36.79 | 31.46 | 39.2 |  |  |
| Tmin | 8.24 | 5.04 | -0.55 | 0.99 | 1.83 | 4.07 | 9.73 | 12.89 |
| Tavg | 15.66 | 13.44 | 8.85 | 9.97 | 13.33 | 15.94 | 18.16 | 24.1 |
| RH | 67.15 | 69.11 | 75.56 | 71.42 | 66.24 | 59.96 | 70.4 | 61.73 | 67.70 |
| Precip | 108.2 | 9.6 | 47.4 | 12 | 10.8 | 38 | 138.4 | 56.2 | 420.6 |  |
| E13 | Tmax | 30.19 | 25.66 | 24.05 | 24.06 | 30.63 | 33.96 | 36.34 | 44.49 |  |  |
| Tmin | 4.6 | 3.84 | 2.09 | 3.83 | 5.11 | 4.18 | 7.87 | 13.71 |
| Tavg | 16.14 | 11.86 | 10.48 | 11.09 | 13.99 | 15.76 | 21 | 26.75 |
| RH | 70.02 | 78.03 | 75.11 | 75.67 | 67.62 | 63.7 | 59.65 | 47.25 | 67.13 |
| Precip | 43.6 | 133.4 | 81.8 | 55.4 | 20.8 | 39.2 | 15.6 | 8 | 397.8 |  |

Precip, Precipitation amount (mm); Tmax, maximum temprerature (°C); Tmin, minimum temperature (°C); Tavg, average temperature (°C); RH relative humidity (%); E, environments.

**Table S2.** AMMI-derived stability index values

| GEN | Y | ASTAB | ASI | ASV | AVAMGE | DA | DZ | EV | FA | MASI | MASV | SIPC | ZA |
| --- | --- | --- | --- | --- | --- | --- | --- | --- | --- | --- | --- | --- | --- |
| G1 | 2101.32 | 665.20 | 8.79 | 41.91 | 2653.69 | 1054.07 | 0.66 | 0.08 | 1111063 | 9.01 | 47.88 | 48.87 | 0.30 |
| G2 | 2139.36 | 829.89 | 7.13 | 34 | 3177.62 | 1071.72 | 0.81 | 0.13 | 1148602 | 7.36 | 43.28 | 57.65 | 0.32 |
| G3 | 2033.44 | 348.48 | 2.43 | 11.58 | 1807.01 | 612.88 | 0.58 | 0.06 | 375622.3 | 2.93 | 27.52 | 38.48 | 0.16 |
| G4 | 1883.69 | 1172.26 | 12.12 | 57.82 | 2947.28 | 1411.52 | 0.87 | 0.15 | 1992407 | 12.32 | 64.01 | 63.31 | 0.39 |
| G5 | 1901.62 | 857.24 | 4.69 | 22.35 | 2731.38 | 1065.31 | 0.81 | 0.13 | 1134894 | 6.17 | 50.29 | 52.04 | 0.28 |
| G6 | 2174.35 | 893.68 | 5.37 | 25.63 | 3138.74 | 1025.79 | 0.90 | 0.16 | 1052253 | 5.83 | 45.47 | 58.76 | 0.28 |
| G7 | 1830.09 | 437.20 | 4.94 | 23.57 | 2252.68 | 790.62 | 0.56 | 0.06 | 625084 | 4.97 | 28.90 | 33.50 | 0.19 |
| G8 | 1790.12 | 280.80 | 2.66 | 12.67 | 1788.89 | 596.92 | 0.47 | 0.04 | 356320.2 | 3.07 | 24.66 | 30.14 | 0.14 |
| G9 | 1889.62 | 786.56 | 6.46 | 30.83 | 3019.75 | 980.91 | 0.87 | 0.15 | 962195.7 | 6.83 | 42.25 | 56.45 | 0.28 |

**ASTAB,** AMMI-based stability parameter; **ASI,** AMMI Stability Index; **ASV,** AMMI Stability Value; **AVAMGE,** Sum across environments of absolute value of GEI modelled by AMMI; **DA,** Annicchiarico’s D parameter values; **DZ,** Zhang's D Parameter; **EV,** Sums of the Averages of the Squared Eigenvector Values; **FA,** Stability Measure Based on Fitted AMMI Model; **MASI,** Modified AMMI Stability Index; **MASV,** Modified AMMI Stability Value; **SIPC,** Sums of the Absolute Value of the IPC Scores; **Za,** Zobel and Annicchiarico’s stability index.

.

**Table S3.** Model Performance and Variable Importance from Partial Least Squares Regression

| VALIDATION: RMSEP | | | | | |
| --- | --- | --- | --- | --- | --- |
|  | 1 comps | 2 comps | 3 comps | 4 comps | 5 comps |
| CV | 795.2 | 770.4 | 998.3 | 1050 | 1100 |
| adjCV | 787.5 | 764.4 | 964.6 | 1015 | 1060 |
| TRAINING: % variance explained | | | | | |
|  | 1 comps | 2 comps | 3 comps | 4 comps | 5 comps |
| EV | 95.09 | 98.45 | 99.79 | 99.93 | 100 |
| GY | 57.95 | 63.83 | 66.73 | 68.77 | 69.35 |
| Explanatory variables importance | | | | | |
| EV | Tmax | Tmin | Tavg | RH | Precip |
| VIP | 0.258 | 0.078 | 0.026 | 0.789 | 2.074 |

RMSEP: Root Mean Square Error of Prediction; CV: cross-validation; adjCV: Adjusted Cross-Validation; EV: Explanatory Variables; GY: Grain Yield; VIP: Variable Importance in Projection; Tmax: Maximum Temperature; Tmin: Minimum Temperature; Tavg: Average Temperature, RH: Relative Humidity; Precip: Precipitation
